# Supplementary material
Source: Elsevier journal article supplement (https://www.sciencedirect.com/science/article/pii/S0377473221000912)
Supplement: mmc2 [file S0377473221000912:mmc2.xlsx]

## Sheet: Supp Table S2a (TRIO)
Supplementary Table S2a. Paternity index (PI) estimated by INDEL locus and combined from 25 Mexican families adapted as STANDARD TRIO paternity cases. The color code of the INDEL columns are related with the fluorocroms used during the capillary electrophoresis 5.
	B01	B02	B03	B04	B05	B06	B07	B08	B09	B10	G01	G02	G03	G04	G05	G06	G07	G08	G09	Y01	Y02	Y03	Y04	Y05	Y06	Y07	Y08	Y09	R01	R02	R03	R04	R05	R06	R07	R08	R09	R10	Combined PI
Fam 4512	1.89825	1	1.64706	1.27259	1	1	1.98216	1.68407	0.713369	1.39997	2.87191	1	1.51332	1.25849	1.25141	1.20424	2.05508	2.19587	1.55545	1	1.96464	1	2.73149	1	1.73641	1	1.58856	2.11327	1.44509	2.94724	1	1.70765	0.772439	1	1	2.40848	1.16063	1	377002
Fam 4514	1	1.23092	1.27259	1.64718	1.51355	1.40885	2.01816	1.68407	3.34336	1	1	1	0.746714	1.25849	1.25141	1	2.05508	1.83621	1	1.47362	1	1	1.57754	1	1.73641	1.64718	0.794281	1.30993	3.24675	1.47362	0.751654	1	0.772439	0.708818	1.14286	2.40848	1	1.9478	20262.1
Fam 4116	1	1.68407	1	1.64718	1.51355	1.72295	2.01816	0.842034	1	1.39997	1	1	1.49343	1.25849	2.4888	1.70999	2.05508	2.19587	0.777726	1.51355	0.670691	1	1	1	1.17897	0.823588	1.34953	2.11327	0.722543	1.51355	1.49343	2.41313	1.54488	1.41764	0.888889	1.70999	1.16063	2.05508	42497.7
Fam 4593	2.11327	1.23092	1.64718	1	0.756773	1.40885	1	2.46184	1.42674	1	1.53421	1	1.49343	1.25849	1	2.40848	1.9478	1	1	2.94724	1.34138	1	1	1.41764	1	1.64718	1.58856	1.30993	1.44509	1.51355	1.50331	1.70765	1.54488	1	1.77778	1	1.16063	2.05508	153364
Fam 4599	2.11327	1.68407	1	1.64718	1.51355	1	0.99108	1.68407	0.713369	1.39997	1	1	1.49343	2.43427	1	0.854993	1.9478	1.09794	1.55545	1	1	2.66667	1.57754	1	0.868206	1	0.794281	1.30993	1	1	0.751654	2.41313	1	1.41764	1.77778	1.70999	1.16063	1	5271.9
Fam 4606	1.89825	1.68407	0.823588	1.27259	1.51355	1.40885	1	1.68407	1.42674	0.699986	1.53421	1.00908	0.746714	0.629247	0.625704	1.70999	1.9478	0.918105	1.40017	1	1.34138	1.33333	1	1	1.73641	1.27259	0.794281	1.30993	1	0.756773	1	1.70765	1	3.39443	1	0.854993	7.22543	2.05508	5362.55
Fam 4612	1	2.46184	1.27259	1.64718	1.51355	3.4459	2.01816	1.23092	0.713369	1	1	1.00908	1.49343	1.25849	4.9776	1.20424	0.973899	0.918105	1	1.51355	1.34138	1	1	1.69722	1.73641	1	2.69906	1	1	1.51355	1	2.41313	1	0.708818	2.28571	1.20424	1.16063	1	64755.6
Fam 4631	1	0.842034	1.64718	1	0.756773	1.40885	1	2.46184	1	1.39997	1.53421	0.99108	0.746714	1.25849	1.25141	1	1.02754	1	2.80034	1	0.670691	1	0.788768	1.69722	1.73641	1	0.794281	4.22654	1	1	0.751654	1.20656	1.54488	3.39443	2.28571	2.40848	7.22543	1.9478	50572
Fam 4636	1	1	1.64718	1.64718	0.756773	1.40885	1.00908	1.68407	1.42674	1.39997	0.767106	1	1	1.25849	0.625704	1	1.9478	1.83621	1.55545	1	1.96464	1	1.36575	1	1	1.64718	2.69906	1.30993	1.44509	0.756773	1.50331	1	0.772439	1.69722	1	1	1.16063	1	1289.77
Fam 4637	2.11327	1	1	1.27259	1.51355	1.40885	1.98216	1.68407	0.713369	0.699986	1.53421	1.00908	3.02663	1.25849	1.25141	1	0.973899	0.918105	0.777726	1	1.96464	1	1.57754	0.708818	1	1.27259	1.58856	1.30993	1	1	1.50331	2.41313	1.41764	1	1	1	3.61272	1.02754	5447.79
Fam 4641	1.05664	0.842034	1.27259	1.27259	1.51355	0.704424	1	1	1.42674	1.75009	1.43596	1.98216	1	1.25849	1.25141	1	2.05508	0.918105	1.55545	0.756773	1.34138	0.8	0.788768	1	1.73641	1	2.69906	1.30993	1	0.756773	1.50331	1	1	1.69722	1	0.854993	0.580316	1	190.116
Fam 4643	2.11327	2.46184	1.64718	1.27259	1.51355	1.40885	1.98216	0.842034	0.713369	0.699986	1	0.99108	1	1	1	1.20424	1.9478	1.83621	2.80034	1.51355	1.34138	0.8	1	0.708818	0.868206	1	1	1	1.44509	0.756773	0.751654	1.70765	1.41764	1.41764	1.14286	0.854993	1.16063	1	740.837
Fam 4647	1	1	0.823588	2.54518	1	1.72295	1.00908	2.46184	1.42674	1.39997	1.53421	1.00908	3.02663	1.25849	1	1.70999	2.05508	1	1	0.756773	1.96464	2.66667	1	1	1	1.64718	1.34953	1.30993	1	1	2.98686	1	1.54488	0.708818	1	2.40848	3.61272	1	122011
Fam 4649	0.949127	1.68407	0.823588	1	2.94724	1.40885	0.99108	1.23092	1.42674	1.39997	1	1.00908	1.49343	1	1	1.70999	0.973899	1.83621	0.777726	1.47362	3.92927	1.33333	1	1.69722	0.868206	0.823588	1.58856	1.30993	0.722543	2.94724	0.751654	1.70765	1.54488	1.41764	2.28571	1.20424	1.16063	0.973899	17334.1
Fam 4684	1.89825	1.23092	1.27259	1	1.51355	1.40885	1	2.46184	1.42674	1.39997	1.53421	0.99108	0.746714	1	1.25141	1.20424	1	1.09794	1.40017	1	0.670691	1	1.36575	3.39443	0.868206	2.54518	1.34953	1.30993	1	0.756773	0.751654	2.41313	1.54488	1.41764	2.28571	0.854993	3.61272	1	21141.9
Fam 4700	2.11327	0.842034	1	1.64718	1	1.72295	1	2.46184	0.713369	1.75009	2.87191	0.99108	0.746714	1.25849	1.25141	0.854993	1	1	1.55545	2.94724	1.34138	0.8	1	1.41764	1.73641	1.64718	1.58856	1.30993	1.44509	1.47362	1.50331	1.70765	1.41764	3.39443	1.14286	2.40848	1.16063	0.973899	150905
Fam 4725	1.89825	2.46184	1.64718	2.54518	1.51355	1.40885	0.99108	1.23092	1	3.50018	0.767106	1	1.49343	0.629247	0.625704	2.40848	2.05508	1.83621	1.55545	1.89825	2.46184	1.64718	2.54518	1.51355	1.40885	0.99108	1.23092	1	3.50018	0.767106	1	1.49343	0.629247	0.625704	2.40848	2.05508	1.83621	1.55545	1.29384e+06
Fam 4734	1.89825	2.46184	2.54518	1.27259	1	0.704424	1.98216	2.46184	1.42674	1	1.53421	2.01816	1	1.25849	1.25141	1.70999	1.9478	1.83621	1	1	0.670691	1	1	1.41764	0.868206	0.823588	0.794281	0.654965	1	1.51355	1.50331	1	1.41764	3.39443	0.888889	1.70999	1.16063	1	15124.1
Fam 4751	1	1.68407	1.64718	1.27259	1.51355	1.40885	1.98216	2.46184	1	1	1.53421	2.01816	0.746714	0.629247	1.25141	1.20424	1.9478	1.09794	1	1.51355	1.34138	0.8	1	1	1.73641	0.823588	1.34953	1.30993	1	1	1	1.70765	1.54488	1.41764	1	0.854993	1.16063	1.9478	5111.94
Fam 4321	1.89825	1	1	1.64718	1.51355	1.40885	0.99108	1.68407	1	1.39997	1.53421	2.01816	1	1.25849	1.25141	1.20424	1	2.19587	1	1.51355	1.34138	1.6	2.73149	3.39443	1.73641	1.27259	1.58856	1.30993	1.44509	1	1.50331	1	1.41764	1.41764	1.77778	1	1.16063	2.05508	515054
Fam 4375	2.11327	1.68407	1.27259	1.64718	1.51355	3.4459	2.01816	0.842034	1	1	1.53421	1.98216	1.49343	2.43427	1.25141	1.70999	1.9478	1	2.80034	1	3.92927	1	0.788768	1	1.17897	1.64718	1.58856	1.30993	1	0.756773	1.50331	0.853825	1.54488	1.41764	2.28571	1.70999	1.16063	1	1.03123e+06
Fam 4384	1	1	1.64718	1	1	1.40885	1.00908	0.842034	3.34336	0.699986	1	1	1.49343	1.25849	2.4888	1	1.9478	1.83621	0.777726	1.51355	3.92927	1	1	3.39443	1	1.64718	1.34953	4.22654	1	1.51355	0.751654	1	0.772439	0.708818	1.77778	2.40848	1.16063	1	35250.1
Fam 4394	1.05664	2.46184	1	2.54518	1	1	1	1.23092	1.42674	1.39997	2.87191	2.01816	1.49343	0.629247	1.25141	2.40848	1	1.83621	1	1.51355	1.34138	1.6	1.36575	1	1	1.64718	0.794281	0.654965	1.62338	1.51355	1	1.20656	1	1	1.14286	2.40848	1.16063	1.02754	18153.3
Fam 4863	1.89825	2.46184	1	0.823588	1.51355	1.40885	1.00908	1	1.67168	1.39997	1.43596	0.99108	1.51332	1.25849	1.25141	1.20424	1.02754	0.918105	1.55545	1.51355	0.670691	1	1.57754	1	2.35793	0.823588	1.58856	4.22654	1.62338	1.47362	1.50331	1	1.54488	1.41764	1.14286	0.854993	3.61272	1.9478	131355
Fam 4632	1.05664	0.842034	1	1.27259	1	1	2.01816	0.842034	1	1.39997	1.53421	2.01816	1.49343	1.25849	2.4888	1.20424	1.9478	1	1	1	1.96464	1	1	1	1	1	1	1.30993	1	0.756773	0.751654	1.70765	1.54488	1.41764	1	1.70999	1.16063	1.02754	1021.71
Average by INDEL	1.52346	1.51745	1.30225	1.47269	1.33629	1.48773	1.40009	1.60621	1.29917	1.304	1.47593	1.28224	1.33978	1.22086	1.42358	1.39317	1.63141	1.40647	1.36802	1.37448	1.65995	1.20189	1.31127	1.41836	1.32374	1.26597	1.422	1.6346	1.32437	1.25845	1.20093	1.53949	1.25024	1.54438	1.45761	1.56011	2.03553	1.34389	163372	Average combined PI	163372
* The color code of the INDEL columns are related with the fluorocroms used during the PCR and detected in the capillary electrophoresis, and is in agreement with the original description 5.																																							1.29384e+06	Maximum combined PI	1.29384e+06
** Classification shaded code of the combined PI apportioned by this 38plex INDEL system: <100, <10000, and > 10000																																							190.116	Minimum combined PI	190.1
																																							**Combined PI	n	freq.
																																							PI<100	0	0
																																							PI<10000	8	0.32
																																							P>10000	17	0.68

## Sheet: Supp Table S2b (DUO)
Supplementary Table S2b. Paternity index (PI) estimated by INDEL locus and combined from 25 Mexican families adapted as DUO paternity cases.
	PI INDEL	B01	B02	B03	B04	B05	B06	B07	B08	B09	B10	G01	G02	G03	G04	G05	G06	G07	G08	G09	Y01	Y02	Y03	Y04	Y05	Y06	Y07	Y08	Y09	R01	R02	R03	R04	R05	R06	R07	R08	R09	R10	Combined PI
Fam 4512	PI (SP-H)	1.89825	1.03648	1.64706	1.27259	1.1152	0.704424	1.98216	1.68407	0.713369	1.39997	2.87191	1.00008	1.13002	0.629247	1.25141	1.02962	1.02754	2.19587	1.55545	1.1152	1.96464	0.8	2.73149	0.708818	1.73641	1.27259	1.58856	2.11327	1.44509	1.47362	1.12254	1.70765	0.772439	1.20302	0.888889	2.40848	1.16063	0.973899	23049
	PI (M-H)	0.949127	1.03648	1.64706	1.27259	1.1152	1.21369	1.98216	0.842034	0.713369	0.699986	1.43596	1.00008	0.746714	2.43427	1.25141	0.854993	0.973899	1.09794	1.55545	1.1152	1.96464	1.06667	2.73149	1.20302	1.73641	1.04809	1.58856	2.11327	1.44509	0.756773	1.12254	1.70765	1.54488	1.20302	1.01587	1.20424	1.16063	1.00072	2806.42
Fam 4514	PI (SP-H)	1.00288	1.23092	1.27259	1.64718	1.51355	1.40885	2.01816	1.68407	1.67168	0.699986	0.767106	0.99108	0.746714	1.25849	1.25141	1.02962	2.05508	1.83621	1.08895	1.1152	1.31766	0.8	1.57754	0.708818	1.73641	1.64718	0.794281	1.30993	1.62338	1.47362	0.751654	0.853825	0.772439	1.20302	1.14286	2.40848	0.580316	1.9478	1441.37
	PI (M-H)	1.00288	1.23092	2.54518	0.823588	1.51355	1.40885	2.01816	0.842034	0.713369	1.22504	1.10153	1.00008	1.49343	1.25849	1.25141	1.02962	2.05508	0.918105	1.08895	0.756773	1.31766	1.06667	0.788768	1.20302	1.73641	1.64718	1.58856	0.654965	0.722543	1.47362	1.50331	1.03019	1.54488	1.69722	1.14286	1.20424	2.09652	0.973899	1639.03
Fam 4116	PI (SP-H)	1.05664	1.68407	0.823588	1.64718	1.51355	1.21369	2.01816	0.842034	1.19253	1.39997	1.10153	0.99108	1.49343	1.25849	2.4888	1.70999	2.05508	2.19587	0.777726	1.51355	0.670691	0.8	0.788768	1.20302	1.17897	1.04809	1.0719	2.11327	1.17296	1.51355	1.12254	2.41313	1.54488	1.41764	0.888889	1.70999	1.16063	1.02754	15877.7
	PI (M-H)	1.00288	0.842034	1.04809	1.64718	1.51355	0.704424	2.01816	1.68407	1.19253	1.39997	1.10153	1.00008	1.49343	1.25849	4.9776	1.70999	2.05508	2.19587	1.55545	0.756773	0.670691	1.06667	1.07726	1.20302	1.17897	1.27259	0.794281	2.11327	1.62338	1.51355	0.751654	1.20656	0.772439	1.41764	0.888889	0.854993	1.16063	1.00072	4152.19
Fam 4593	PI (SP-H)	2.11327	1.23092	1.64718	1.04809	1.1152	1.40885	1.00008	2.46184	1.42674	1.22504	1.53421	1.00008	1.49343	1.25849	1.55725	2.40848	1.9478	1.00802	1.08895	2.94724	1.34138	1.06667	1.07726	1.41764	1.02359	1.64718	1.58856	1.30993	1.44509	1.51355	1.50331	1.70765	1.54488	1.20302	1.77778	1.02962	1.16063	2.05508	722738
	PI (M-H)	2.11327	2.46184	1.64718	1.04809	1.47362	1.40885	1.00008	2.46184	1.42674	1.22504	1.53421	1.00008	1.49343	1.25849	1.55725	2.40848	1.9478	1.00802	1.08895	1.47362	1.34138	1.06667	1.07726	1.41764	1.02359	1.64718	1.58856	1.30993	1.44509	1.51355	1.50331	1.70765	1.54488	1.20302	1.77778	1.02962	1.16063	2.05508	955026
Fam 4599	PI (SP-H)	2.11327	1.68407	1.04809	1.64718	1.51355	0.704424	0.99108	1.68407	0.713369	1.39997	1.10153	0.99108	0.746714	1.53176	1.55725	0.854993	1.9478	1.00802	1.55545	0.756773	0.670691	2.66667	0.788768	1.20302	1.02359	1.04809	0.794281	1.30993	1.17296	1.1152	0.751654	2.41313	1.09504	1.41764	1.77778	1.70999	1.16063	1.00072	1033.6
	PI (M-H)	2.11327	1.68407	1.04809	1.64718	1.51355	1.21369	1.98216	0.842034	0.713369	1.39997	1.10153	1.00008	1.51332	0.629247	1.55725	1.70999	1.9478	0.918105	1.55545	1.1152	1.31766	1.33333	1.36575	1.20302	1.17897	1.04809	1.58856	1.30993	1.17296	1.1152	0.751654	1.20656	1.09504	1.41764	1.77778	0.854993	1.16063	1.00072	3933.84
Fam 4606	PI (SP-H)	0.949127	1.68407	0.823588	1.04809	0.756773	1.40885	1.00908	1.68407	1.42674	0.699986	1.53421	1.00908	1.13002	0.629247	0.625704	1.70999	0.973899	0.918105	1.40017	1.1152	1.34138	1.06667	1.07726	1.20302	1.73641	1.27259	0.794281	1.30993	1.17296	0.756773	1.12254	1.70765	0.772439	3.39443	0.888889	0.854993	3.61272	2.05508	440.603
	PI (M-H)	1.05664	1.68407	1.64718	0.823588	1.47362	1.40885	1.00008	1.68407	1.42674	1.39997	1.53421	2.01816	1.51332	1.25849	1.25141	1.70999	1.02754	1.83621	1.40017	1.1152	1.34138	0.8	1.07726	1.20302	1.73641	2.54518	0.794281	1.30993	1.17296	0.756773	1.12254	1.70765	1.09504	3.39443	1.01587	0.854993	0.580316	1.02754	13129.5
Fam 4612	PI (SP-H)	1.00288	1.23092	1.04809	1.64718	1.51355	3.4459	2.01816	1.03648	0.713369	1.22504	0.767106	1.00908	1.49343	0.629247	4.9776	1.02962	0.973899	0.918105	1.08895	1.51355	1.34138	1.06667	0.788768	1.69722	1.73641	1.04809	2.69906	0.654965	1.62338	1.51355	0.751654	1.20656	1.41764	0.708818	2.28571	1.02962	1.16063	1.00072	4210.37
	PI (M-H)	1.00288	0.842034	0.823588	1.64718	0.756773	1.72295	2.01816	0.842034	1.42674	1.22504	1.10153	1.00908	1.49343	2.43427	2.4888	0.854993	0.973899	1.83621	1.08895	1.51355	1.34138	1.06667	1.07726	1.69722	1.73641	1.04809	2.69906	1.38412	1.17296	0.756773	1.12254	0.853825	1.09504	1.41764	2.28571	0.854993	1.16063	1.00072	5995.06
Fam 4631	PI (SP-H)	0.949127	0.842034	1.64718	0.823588	0.756773	1.40885	0.99108	2.46184	1.67168	1.39997	1.53421	0.99108	0.746714	1.25849	1.25141	1.02962	1.02754	1.09794	2.80034	0.756773	0.670691	1.06667	0.788768	1.69722	1.73641	1.04809	1.0719	2.11327	1.17296	1.47362	0.751654	1.20656	0.772439	3.39443	2.28571	1.20424	3.61272	0.973899	4566.17
	PI (M-H)	1.00288	1.68407	0.823588	1.04809	0.756773	1.40885	1.00008	1.23092	1.19253	1.39997	0.767106	0.99108	0.746714	1.25849	1.25141	1.02962	2.05508	1.00802	2.80034	1.1152	0.670691	1.06667	1.57754	1.69722	1.73641	1.04809	1.34953	0.654965	1.17296	1.1152	1.50331	2.41313	1.41764	3.39443	2.28571	0.854993	0.580316	1.02754	1559.78
Fam 4636	PI (SP-H)	1.00288	1.03648	1.64718	1.64718	0.756773	1.40885	1.00008	1.68407	1.42674	1.39997	1.10153	1.00008	1.13002	0.629247	0.625704	1.20424	1.9478	1.83621	1.55545	0.756773	1.31766	1.06667	1.36575	1.69722	0.868206	1.64718	1.34953	1.30993	1.44509	0.756773	1.50331	1.03019	0.772439	1.69722	1.14286	0.854993	1.16063	1.00072	521.684
	PI (M-H)	1.00288	1.03648	0.823588	1.64718	1.51355	1.40885	0.99108	0.842034	1.42674	1.39997	1.43596	1.00008	1.13002	2.43427	1.25141	1.02962	0.973899	1.83621	1.55545	1.1152	0.670691	1.06667	1.36575	1.20302	1.02359	0.823588	0.794281	0.654965	1.44509	0.756773	1.50331	1.03019	1.54488	1.69722	1.01587	1.02962	1.16063	1.00072	220.074
Fam 4637	PI (SP-H)	2.11327	0.842034	1.27259	1.04809	1.51355	1.40885	1.98216	1.68407	0.713369	0.699986	0.767106	1.00008	1.51332	1.25849	1.25141	1.02962	0.973899	0.918105	0.777726	0.756773	1.31766	1.06667	1.57754	0.708818	1.02359	1.27259	1.58856	0.654965	1.17296	1.1152	1.50331	2.41313	1.09504	1.69722	1.01587	1.02962	2.09652	1.00072	344.519
	PI (M-H)	1.05664	1.03648	1.04809	0.823588	1.51355	1.40885	0.99108	0.842034	0.713369	0.699986	1.43596	0.99108	0.746714	1.25849	1.25141	1.02962	1.9478	1.83621	0.777726	1.1152	0.670691	1.06667	1.57754	0.708818	1.02359	2.54518	0.794281	2.11327	1.17296	1.1152	0.751654	2.41313	0.772439	1.20302	1.01587	1.02962	0.580316	0.973899	20.4724
Fam 4641	PI (SP-H)	1.00288	0.842034	1.27259	1.04809	1.51355	0.704424	1.00008	1.23092	1.42674	1.75009	1.10153	1.98216	1.51332	1.25849	1.25141	1.02962	2.05508	0.918105	1.55545	0.756773	1.34138	1.06667	1.07726	1.20302	1.73641	1.04809	2.69906	0.654965	0.722543	1.1152	1.50331	1.03019	1.09504	1.20302	0.888889	0.854993	0.580316	1.00072	190.117
	PI (M-H)	0.949127	1.68407	1.27259	0.823588	0.756773	1.40885	1.00008	1.03648	1.42674	3.50018	0.767106	0.99108	1.13002	1.25849	1.25141	1.02962	1.02754	1.83621	0.777726	1.51355	0.670691	1.33333	1.36575	1.20302	1.73641	1.04809	2.69906	2.11327	1.17296	1.47362	0.751654	1.03019	1.09504	0.708818	1.01587	0.854993	1.16063	1.00072	457.253
Fam 4643	PI (SP-H)	2.11327	1.23092	1.64718	1.04809	1.51355	1.40885	1.98216	0.842034	0.713369	0.699986	1.10153	1.00008	1.13002	1.53176	1.55725	1.20424	1.9478	1.83621	2.80034	0.756773	1.34138	1.06667	1.07726	0.708818	0.868206	1.04809	0.794281	0.654965	1.44509	0.756773	0.751654	1.70765	1.41764	1.41764	1.14286	0.854993	1.16063	1.02754	367.77
	PI (M-H)	2.11327	0.842034	0.823588	0.823588	0.756773	1.40885	0.99108	0.842034	1.42674	1.39997	1.10153	1.00908	1.13002	1.53176	1.55725	2.40848	1.9478	1.83621	1.40017	1.47362	1.34138	1.33333	1.07726	1.41764	0.868206	1.04809	1.0719	1.38412	0.722543	1.51355	1.50331	0.853825	2.83527	1.41764	1.14286	0.854993	1.16063	1.00072	2697.06
Fam 4647	PI (SP-H)	1.05664	0.842034	0.823588	2.54518	1.1152	1.21369	1.00908	2.46184	1.42674	1.39997	1.53421	1.00908	1.51332	1.25849	1.55725	1.70999	1.02754	1.00802	1.08895	0.756773	1.31766	1.33333	1.07726	1.20302	1.17897	0.823588	1.34953	1.30993	1.17296	0.756773	2.98686	1.20656	1.54488	0.708818	0.888889	2.40848	3.61272	1.00072	8894.68
	PI (M-H)	1.00288	1.03648	0.823588	1.27259	1.1152	0.704424	2.01816	1.23092	1.42674	1.39997	1.53421	2.01816	0.746714	1.25849	1.55725	1.70999	0.973899	1.00802	1.08895	1.51355	0.670691	0.8	1.07726	1.20302	1.02359	1.27259	1.34953	1.30993	1.17296	1.1152	1.49343	1.03019	1.54488	1.41764	1.01587	1.20424	3.61272	1.00072	1661.77
Fam 4649	PI (SP-H)	0.949127	1.68407	0.823588	0.823588	1.47362	1.40885	0.99108	1.23092	1.42674	1.39997	1.10153	1.00008	0.746714	0.629247	1.55725	1.70999	0.973899	1.83621	0.777726	1.1152	1.96464	1.33333	1.07726	1.20302	1.02359	0.823588	0.794281	1.30993	1.17296	1.47362	0.751654	1.70765	1.54488	1.41764	1.14286	1.20424	1.16063	0.973899	263.911
	PI (M-H)	1.89825	1.68407	0.823588	1.04809	0.756773	0.704424	1.98216	2.46184	1.42674	1.39997	1.10153	0.99108	1.51332	1.53176	1.55725	1.70999	1.9478	1.83621	0.777726	0.756773	0.670691	2.66667	1.07726	0.708818	1.17897	0.823588	1.34953	1.30993	1.62338	0.756773	1.50331	1.70765	1.54488	1.41764	0.888889	1.20424	1.16063	1.9478	7968.86
Fam 4684	PI (SP-H)	1.89825	1.23092	1.27259	1.04809	1.51355	1.40885	1.00908	2.46184	1.42674	1.39997	1.53421	0.99108	0.746714	0.629247	1.25141	1.02962	1.00072	1.00802	1.40017	0.756773	0.670691	1.06667	1.36575	3.39443	1.02359	2.54518	1.0719	1.30993	1.17296	1.1152	0.751654	2.41313	1.54488	1.41764	1.14286	0.854993	2.09652	1.02754	4305.56
	PI (M-H)	1.89825	1.23092	1.27259	1.04809	0.756773	1.40885	1.00008	1.23092	1.42674	0.699986	0.767106	0.99108	0.746714	1.53176	1.25141	0.854993	1.00072	0.918105	2.80034	1.1152	0.670691	1.06667	1.36575	1.69722	1.17897	1.27259	0.794281	1.30993	1.17296	1.47362	0.751654	1.20656	0.772439	0.708818	0.888889	1.70999	0.580316	1.00072	21.3875
Fam 4700	PI (SP-H)	2.11327	0.842034	1.27259	1.64718	0.756773	1.72295	0.99108	1.23092	0.713369	1.22504	2.87191	0.99108	0.746714	1.25849	1.25141	1.02962	1.00072	1.09794	1.55545	1.47362	1.34138	0.8	1.07726	1.41764	1.73641	0.823588	1.58856	1.30993	1.44509	1.1152	1.50331	1.70765	1.41764	1.69722	1.14286	1.20424	1.16063	0.973899	3398.55
	PI (M-H)	1.05664	0.842034	1.04809	0.823588	1.1152	1.72295	1.00008	0.842034	1.42674	0.699986	1.43596	1.98216	0.746714	1.25849	1.25141	1.20424	1.00072	1.00802	1.55545	0.756773	1.34138	1.6	1.07726	0.708818	0.868206	1.27259	0.794281	0.654965	0.722543	0.756773	0.751654	1.70765	1.41764	0.708818	1.14286	0.854993	1.16063	1.9478	8.71675
Fam 4725	PI (SP-H)	0.949127	1.23092	0.823588	1.27259	1.51355	1.40885	1.00008	1.03648	1.19253	1.75009	0.767106	1.00908	1.49343	0.629247	0.625704	2.40848	2.05508	0.918105	1.55545	1.1152	1.34138	1.06667	1.07726	1.20302	1.73641	1.04809	0.794281	1.38412	0.722543	2.94724	1.12254	1.03019	0.772439	1.41764	1.01587	0.854993	1.16063	0.973899	199.055
	PI (M-H)	1.1152	1.34138	1.06667	1.07726	1.20302	1.73641	1.04809	0.794281	1.38412	0.722543	2.94724	1.12254	1.03019	0.772439	1.41764	1.01587	0.854993	1.16063	0.973899	0.756773	1.34138	1.06667	1.07726	0.708818	1.73641	1.04809	1.58856	0.654965	1.62338	2.94724	1.12254	1.20656	1.09504	1.41764	1.14286	1.02962	1.16063	1.02754	242.091
Fam 4734	PI (SP-H)	0.949127	1.23092	2.54518	1.04809	0.756773	0.704424	0.99108	2.46184	1.42674	0.699986	1.53421	2.01816	1.13002	1.25849	1.25141	1.70999	1.9478	1.83621	0.777726	0.756773	0.670691	1.06667	1.07726	1.41764	0.868206	1.04809	0.794281	0.654965	1.62338	1.51355	1.50331	0.853825	1.41764	3.39443	0.888889	1.70999	1.16063	1.00072	1112.65
	PI (M-H)	1.05664	0.842034	2.54518	0.823588	1.1152	1.40885	1.00908	1.23092	1.42674	1.22504	1.53421	2.01816	1.13002	1.25849	1.25141	1.70999	1.9478	0.918105	1.08895	1.1152	1.34138	1.06667	1.07726	1.41764	0.868206	1.27259	1.58856	0.654965	1.17296	0.756773	1.50331	1.03019	2.83527	3.39443	1.77778	1.70999	1.16063	1.00072	15274.4
Fam 4751	PI (SP-H)	0.949127	1.68407	1.64718	1.27259	0.756773	0.704424	1.98216	2.46184	1.19253	1.22504	1.53421	1.00908	0.746714	0.629247	1.25141	1.02962	1.9478	1.00802	0.777726	1.51355	1.34138	0.8	1.07726	1.20302	1.73641	1.04809	1.0719	1.30993	1.17296	0.756773	0.751654	1.70765	1.54488	1.41764	0.888889	0.854993	1.16063	0.973899	210.115
	PI (M-H)	1.00288	1.68407	0.823588	2.54518	1.47362	1.72295	0.99108	2.46184	1.19253	1.22504	0.767106	0.99108	0.746714	1.25849	1.25141	0.854993	1.9478	0.918105	1.08895	0.756773	1.34138	0.8	1.07726	1.20302	1.73641	1.27259	0.794281	1.30993	1.17296	1.1152	1.12254	1.70765	0.772439	1.41764	1.01587	1.70999	0.580316	1.02754	328.23
Fam 4321	PI (SP-H)	0.756773	1.34138	0.8	1.07726	1.20302	1.73641	1.27259	0.794281	1.30993	1.17296	1.1152	1.12254	1.70765	0.772439	1.41764	1.01587	1.70999	0.580316	1.02754	1.51355	1.34138	1.6	2.73149	1.69722	1.73641	1.04809	1.58856	0.654965	1.44509	0.756773	1.50331	1.20656	1.41764	1.41764	0.888889	1.02962	1.16063	1.02754	853.89
	PI (M-H)	0.949127	1.03648	1.04809	1.27259	1.51355	1.40885	0.99108	0.842034	1.19253	0.699986	1.53421	0.99108	1.13002	1.25849	0.625704	1.20424	1.00072	1.09794	1.08895	0.756773	0.670691	0.8	1.36575	0.708818	0.868206	0.823588	1.58856	2.11327	1.44509	1.1152	0.751654	1.03019	1.41764	0.708818	1.14286	1.02962	1.16063	0.973899	5.97951
Fam 4375	PI (SP-H)	1.05664	1.68407	1.04809	1.64718	1.51355	1.72295	2.01816	0.842034	1.19253	1.75009	1.53421	1.98216	1.49343	1.53176	1.25141	0.854993	1.9478	0.918105	1.40017	0.756773	1.96464	1.06667	0.788768	0.708818	1.17897	1.64718	1.58856	1.30993	0.722543	0.756773	0.751654	1.03019	1.54488	1.41764	2.28571	1.70999	1.16063	1.02754	8201.04
	PI (M-H)	0.949127	1.68407	0.823588	0.823588	1.51355	0.704424	1.00908	0.842034	1.19253	1.22504	1.53421	0.99108	0.746714	0.629247	1.25141	1.20424	0.973899	1.00802	0.777726	1.1152	0.670691	1.06667	0.788768	1.20302	2.35793	1.64718	1.58856	1.30993	1.17296	0.756773	1.49343	1.20656	1.54488	1.41764	2.28571	1.70999	1.16063	1.00072	114.765
Fam 4384	PI (SP-H)	0.949127	0.842034	1.64718	1.04809	0.756773	0.704424	1.00908	0.842034	1.67168	0.699986	0.767106	1.00008	1.49343	1.25849	1.55725	0.854993	0.973899	0.918105	1.08895	1.51355	1.96464	1.33333	0.788768	1.69722	0.868206	0.823588	1.34953	4.22654	0.722543	1.51355	0.751654	0.853825	0.772439	0.708818	0.888889	1.02962	1.16063	0.973899	11.7634
	PI (M-H)	1.00288	1.03648	1.64718	1.04809	1.1152	1.72295	1.00908	0.842034	0.713369	1.39997	1.10153	1.00008	0.746714	1.25849	0.625704	1.02962	1.02754	1.09794	1.40017	1.51355	0.670691	1.06667	1.07726	0.708818	1.02359	1.27259	2.69906	4.22654	1.17296	1.51355	0.751654	1.03019	1.54488	1.41764	1.01587	1.02962	1.16063	1.00072	138.517
Fam 4394	PI (SP-H)	1.00288	1.23092	0.823588	2.54518	1.1152	0.704424	0.99108	1.03648	1.42674	1.39997	1.43596	2.01816	1.49343	0.629247	1.25141	1.20424	1.00072	0.918105	1.08895	1.51355	1.34138	1.6	1.07726	0.708818	0.868206	1.64718	0.794281	0.654965	1.17296	1.51355	0.751654	1.03019	0.772439	0.708818	1.14286	2.40848	1.16063	1.02754	78.0854
	PI (M-H)	0.949127	0.842034	1.04809	1.27259	1.1152	1.21369	1.00008	0.842034	1.42674	1.39997	0.767106	2.01816	0.746714	1.25849	1.25141	0.854993	1.00072	1.09794	1.08895	1.51355	1.34138	1.6	0.788768	1.20302	1.02359	1.64718	1.58856	0.654965	0.722543	0.756773	1.12254	0.853825	1.09504	1.20302	2.28571	1.20424	1.16063	2.05508	110.773
Fam 4863	PI (SP-H)	0.949127	2.46184	1.04809	0.823588	1.51355	1.40885	1.00008	0.842034	1.19253	0.699986	1.10153	0.99108	1.51332	1.25849	1.25141	1.02962	1.02754	1.00802	0.777726	1.51355	0.670691	0.8	1.57754	0.708818	1.17897	0.823588	1.58856	2.11327	1.17296	1.47362	1.50331	0.853825	1.54488	1.41764	1.14286	0.854993	3.61272	1.9478	645.207
	PI (M-H)	1.05664	1.23092	1.04809	1.64718	1.51355	0.704424	0.99108	1.03648	0.713369	1.75009	0.767106	1.98216	1.51332	1.25849	1.25141	0.854993	2.05508	1.09794	1.40017	1.51355	0.670691	1.06667	0.788768	1.20302	0.868206	1.64718	1.58856	0.654965	0.722543	1.47362	0.751654	1.03019	1.54488	0.708818	2.28571	0.854993	3.61272	0.973899	285.226
Fam 4632	PI (SP-H)	1.05664	0.842034	1.04809	1.04809	1.1152	0.704424	1.00908	1.03648	0.713369	1.39997	0.767106	2.01816	1.49343	1.25849	1.55725	1.02962	1.9478	1.09794	0.777726	0.756773	1.31766	1.33333	1.07726	0.708818	0.868206	1.04809	0.794281	1.30993	0.722543	0.756773	0.751654	1.70765	1.54488	1.41764	0.888889	1.70999	1.16063	1.02754	16.6659	Average Combined PI motherless	32118.9
	PI (M-H)	1.05664	1.68407	1.04809	0.823588	1.1152	1.21369	0.99108	1.23092	1.19253	1.39997	1.43596	2.01816	0.746714	1.25849	0.625704	0.854993	1.9478	1.00802	1.08895	1.1152	0.670691	1.06667	1.07726	1.20302	1.02359	1.04809	1.0719	1.30993	1.17296	1.51355	1.50331	1.70765	0.772439	0.708818	1.01587	1.70999	1.16063	1.02754	106.194	Average Combined PI fatherless	40716.1
Average by INDEL		1.24627	1.27924	1.23369	1.26041	1.20557	1.29381	1.30598	1.35197	1.20124	1.24891	1.29055	1.245	1.15013	1.20396	1.45492	1.27509	1.48214	1.26356	1.30006	1.14788	1.14552	1.15733	1.20923	1.2133	1.29757	1.26671	1.35476	1.37916	1.19135	1.21877	1.14074	1.40644	1.29433	1.50671	1.29524	1.24457	1.42979	1.16137	36417.5	Average combined PI-DUO	36417.5
* The color code of the INDEL columns are related with the fluorocroms used during the PCR and detected in the capillary electrophoresis, and is in agreement with the original description 5.																																								955026	Maximum combined PI	955026
** Classification shaded code of the combined PI apportioned by this 38plex INDEL system: <100, <10000, and > 10000																																								5.97951	Minimum combined PI	5.97951
																																								**Combined PI	n	freq.
																																								PI<100	7	0.14
																																								PI<10000	43	0.86
																																								P>10000	6	0.12
